# Supplementary material
Source: PubMed Central journal article supplement (PMC4191590)
Supplement: jp508128d_si_001.pdf [file jp508128d_si_001.pdf]

## Supporting Information

# Perturbation of Long-Range Water Dynamics as the Mechanism for the Antifreeze Activity of Antifreeze Glycoprotein.

*Sairam S. Mallajosyula, Kenno Vanommeslaeghe and Alexander D. MacKerell Jr.\**

Department of Pharmaceutical Sciences, University of Maryland, 20 Penn Street HSF II, Baltimore, Maryland  
21201, United States

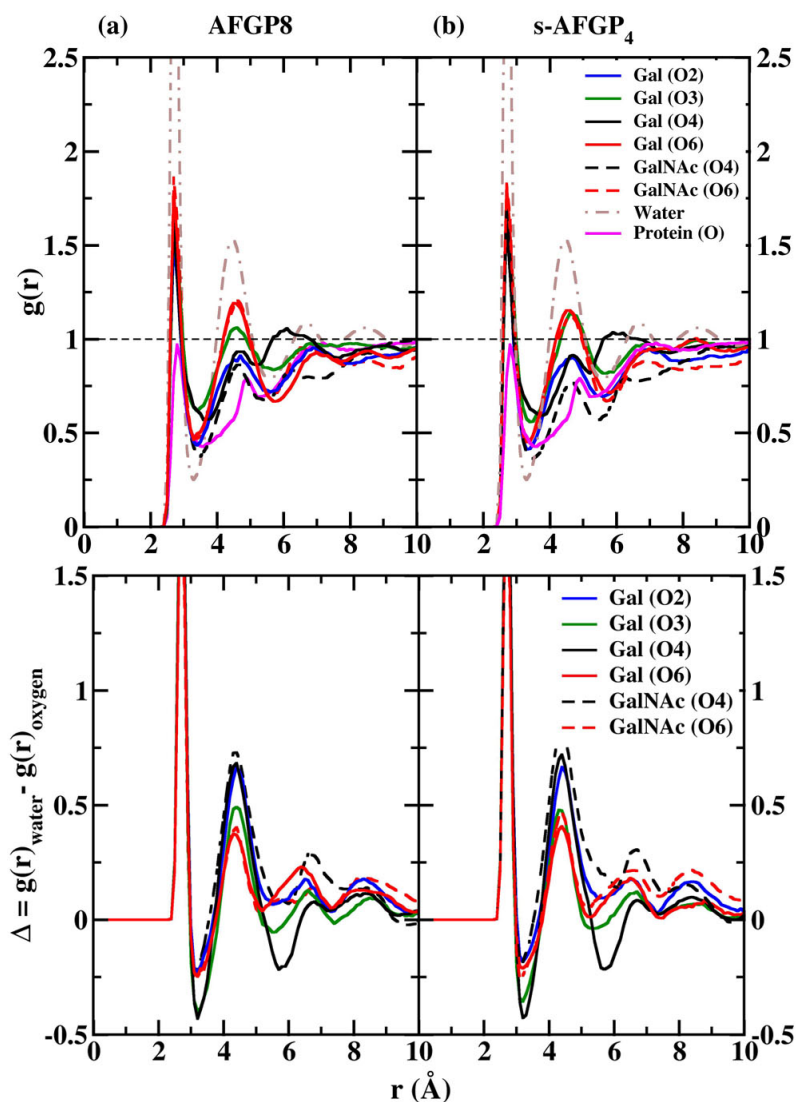

**Figure S1: Upper Panel:** Selected oxygen (carbohydrate) – oxygen (water) radial distribution functions,  $g(r)$ , from 250K simulations of (a) AFGP8 and (b) s-AFGP<sub>4</sub> using the TIP5P water model. The  $g(r)$  for pure water (TIP5P water model) under the same simulation conditions is also presented for comparison. **Lower Panel:** Difference ( $\Delta$ ) between the radial distribution functions.  $\Delta$  is calculated as the difference between  $g(r)$  of pure water and  $g(r)$  of select oxygen (carbohydrate) -oxygen (water) radial distribution from 250K simulations of (a) AFGP8 and (b) s-AFGP<sub>4</sub>.

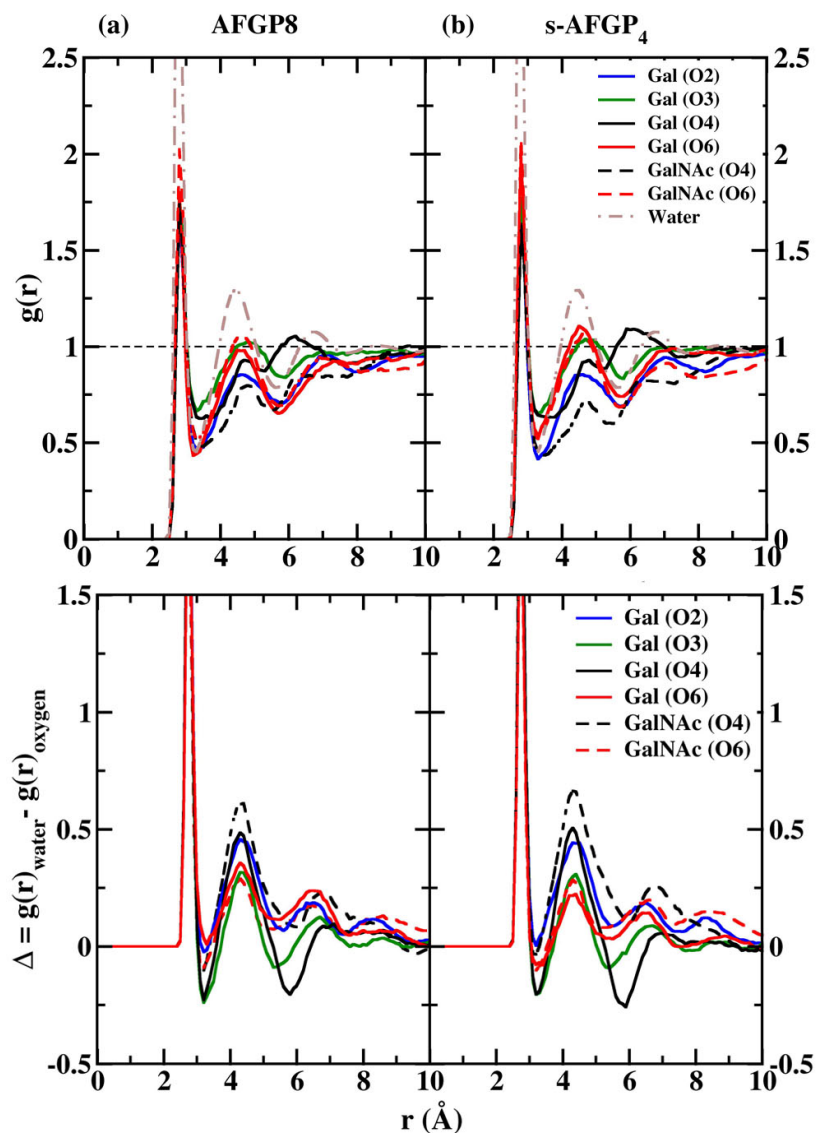

**Figure S2: Upper Panel:** Selected oxygen (carbohydrate) – oxygen (water) radial distribution functions,  $g(r)$ , from 250K simulations of (a) AFGP8 and (b) s-AFGP<sub>4</sub> using the TIP4P-2005 water model. The  $g(r)$  for pure water (TIP4P-2005 water model) under the same simulation conditions is also presented for comparison. **Lower Panel:** Difference ( $\Delta$ ) between the radial distribution functions.  $\Delta$  is calculated as the difference between  $g(r)$  of pure water and  $g(r)$  of select oxygen (carbohydrate) -oxygen (water) radial distribution from 250K simulations of (a) AFGP8 and (b) s-AFGP<sub>4</sub>.

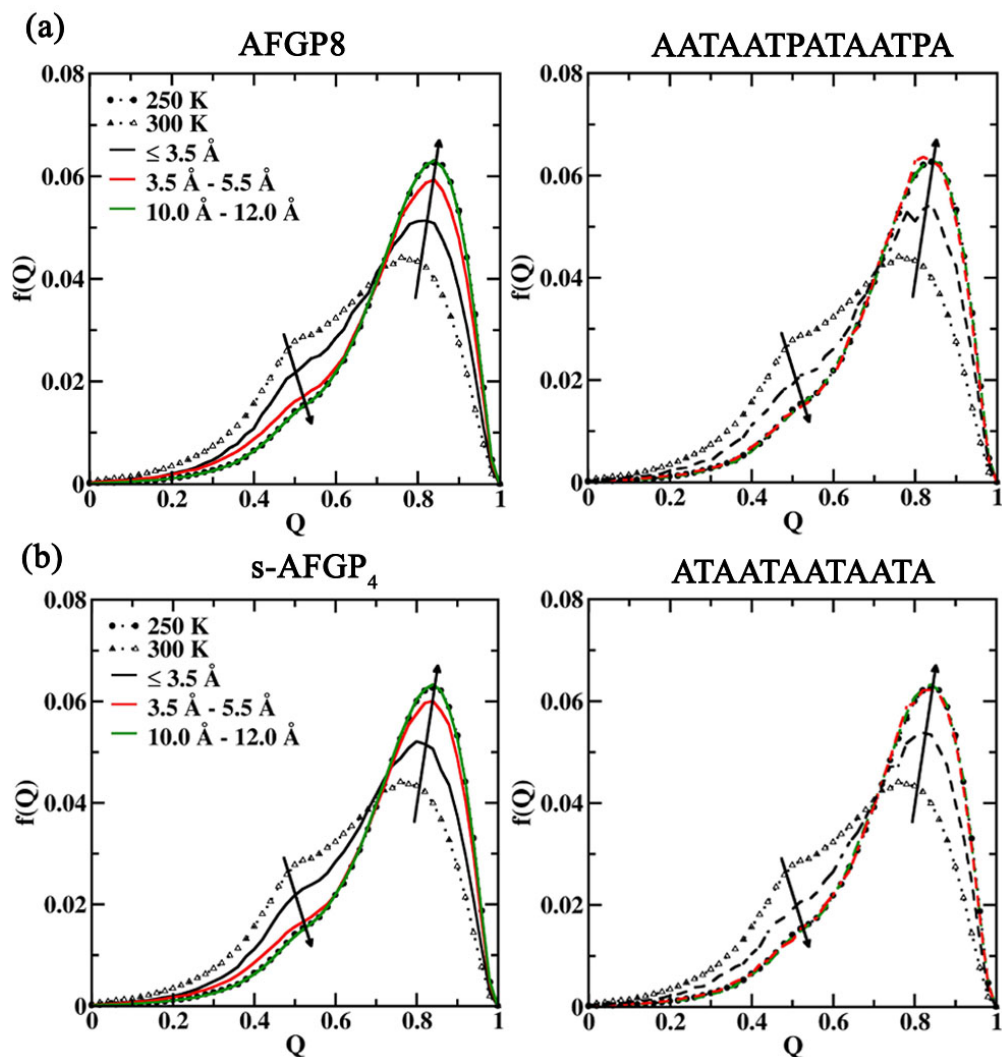

**Figure S3:** Q distributions for water molecules around Gal (left panels) from 250 K simulations of (a) AFGP8 and (b) s-AFGP<sub>4</sub>. The Q distribution for water molecules around protein (right panels) from 250 K protein-only simulations of (a) AATAATPATAATPA and (b) ATAATAATAATA are also presented. The distributions were evaluated for water molecules less than 3.5 Å, between 3.5 Å-5.5 Å, and between 10.0 Å-12.0 Å from the selection (Gal or protein). The Q distribution for pure water at 250 K (dotted line with filled circle) and 300 K (dotted line with open triangles) are also presented. The distributions are evaluated from simulations using the TIP4P-2005 water model.

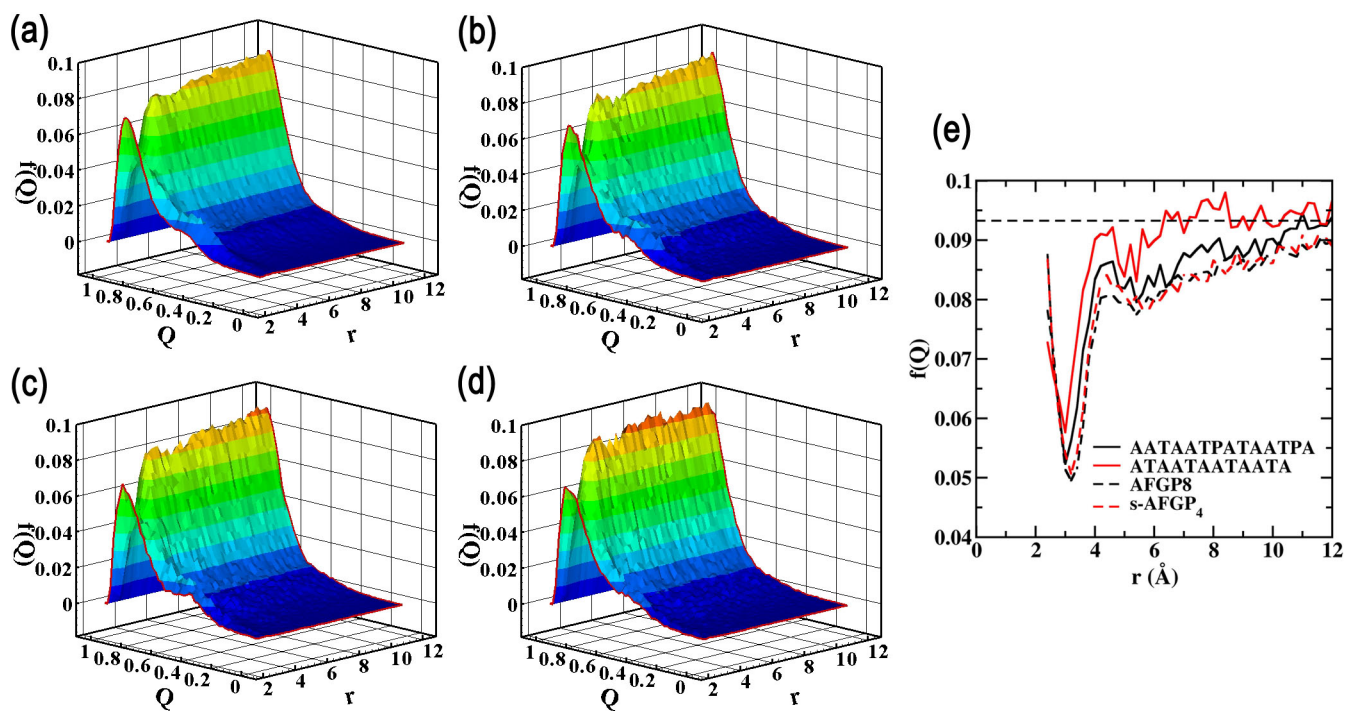

**Figure S4:**  $Q_k$  distribution for water molecules around Gal evaluated in increments of 0.2 Å shells from the glycopeptides from 250 K simulations of (a) AFGP8 and (b) s-AFGP<sub>4</sub>. The  $Q_k$  distribution for water molecules around protein evaluated in increments of 0.2 Å shells from 250 K protein-only simulation of (c) AATAATPATAATPA and (d) ATAATAATAATA. (e) The trace of the highest  $Q_k$  peak from all these profiles. Dotted line indicates the value of the highest  $Q_k$  peak from pure water simulations at 250 K. The distributions are evaluated from simulations using the TIP5P water model.

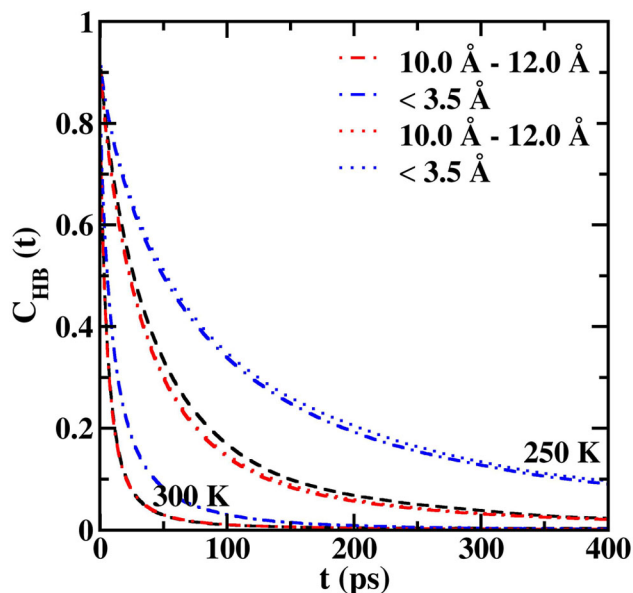

**Figure S5:** Water-water H-bond autocorrelation functions from 250 K and 300 K simulations of AFGP8 (dot dashed lines) and s-AFGP<sub>4</sub> (dotted lines). The autocorrelation functions were evaluated for water molecules within two spatial regions, less than 3.5 Å (blue lines) and 10.0 Å - 12.0 Å (red lines) from the glycopeptides. Autocorrelation functions evaluated from 250 K and 300 K pure water simulations (dashed black line) are also presented for comparison. The distributions are evaluated from simulations using the TIP4P-2005 water model.

| AFGP8      |        | s-AFGP <sub>4</sub> |        | Water  |        |
|------------|--------|---------------------|--------|--------|--------|
| 250 K      | 300 K  | 250 K               | 300 K  | 250 K  | 300 K  |
| TIP5P      |        |                     |        |        |        |
| 0.0066     | 0.3011 | 0.0066              | 0.2998 | 0.0047 | 0.2778 |
| TIP4P-2005 |        |                     |        |        |        |
| 0.0367     | 0.2253 | 0.0362              | 0.2248 | 0.0332 | 0.2137 |

**Table S1:** Diffusion Coefficient (D) estimated from the mean square displacement (MSD) of water oxygen atoms. MSD were evaluated from the last 2 ns of the molecular dynamics simulations used to calculate the H-bond auto-correlation functions.
